# Supplementary material
Source: PubMed Central journal article supplement (PMC5413107)

**Low-weight AN**

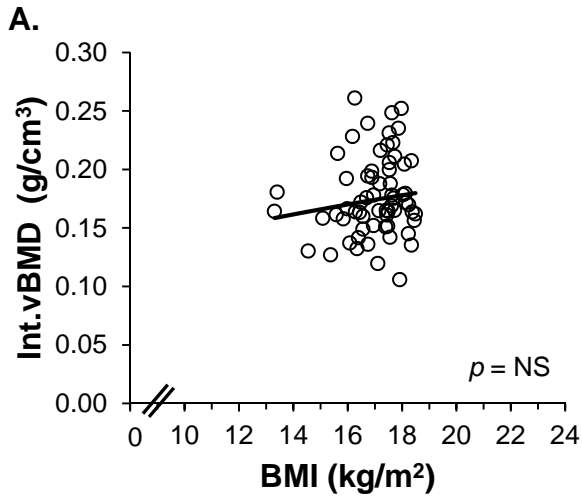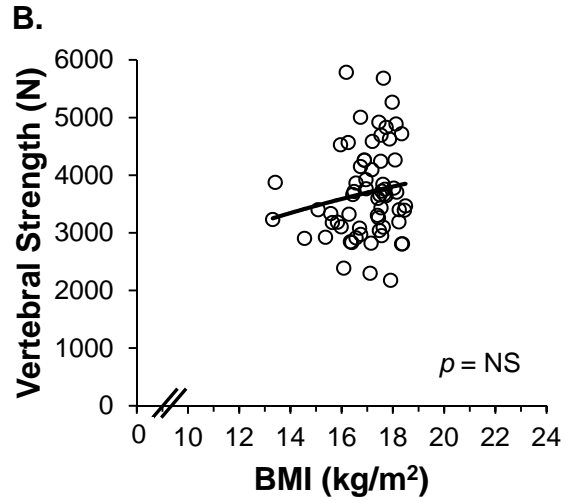

**Atypical AN**

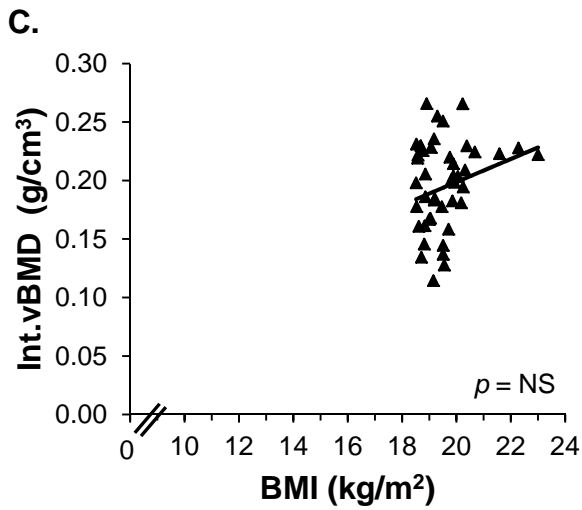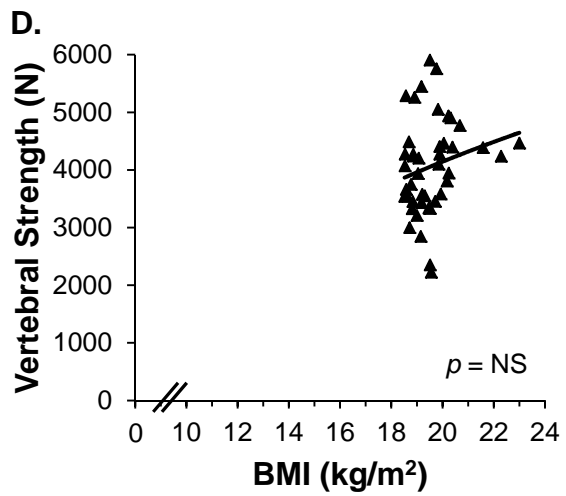

**Low-weight AN**

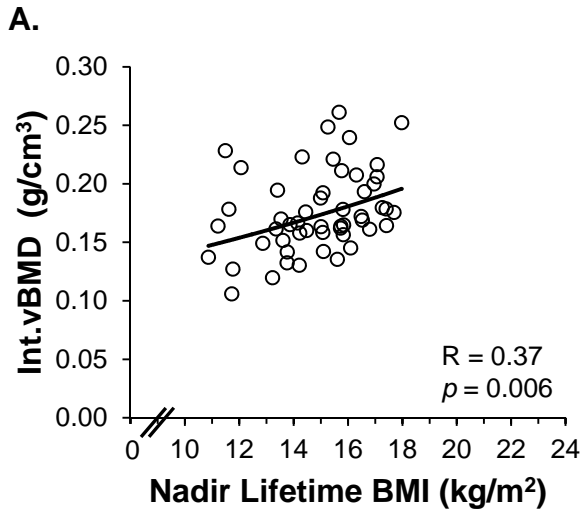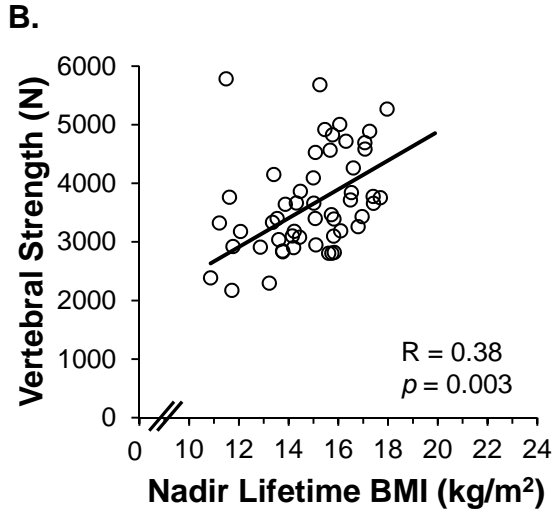

**Atypical AN**

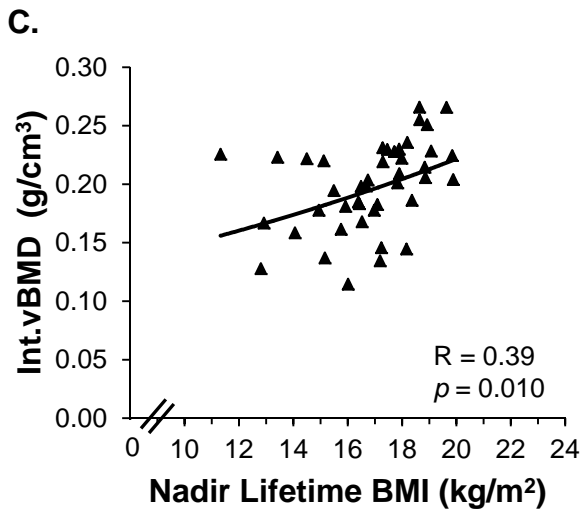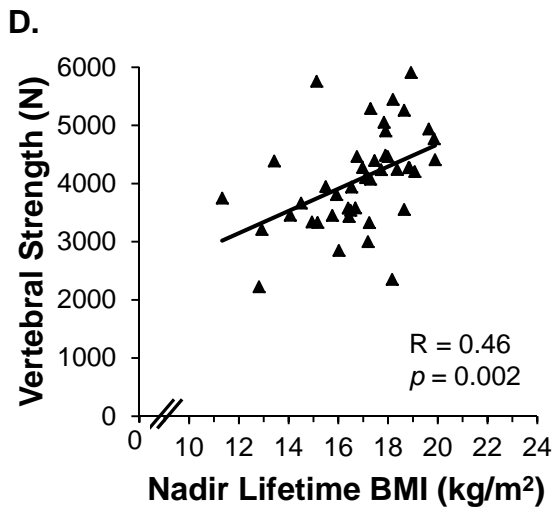

Supplement: jc.2016-2099.sf1.pdf [file jc.2016-2099.sf1.pdf]
